# Supplementary material
Source: publisher figshare collection journal article supplement (https://acs.figshare.com/ndownloader/files/10443030)
Supplement: Supplementary file 1 [file 10443030]

# Observation of anisotropic growth and compositional discontinuity in AlGa<sub>N</sub> electron-blocking layers on Ga<sub>N</sub> micro-rods

Woo-Young Jung,<sup>†,⊥</sup> Chan-Min Kwak,<sup>†,⊥</sup> Jae-Bok Seol,<sup>‡,⊥</sup> Jin Kuen Park,<sup>§</sup> Chan-Gyung Park<sup>†,‡</sup>

Young Kyu Jeong<sup>||,\*</sup>

<sup>†</sup>*Department of Materials Science and Engineering, POSTECH, Pohang 37673, South Korea*

<sup>‡</sup>*National Institute for Nanomaterials Technology, POSTECH, Pohang 37673, South Korea*

<sup>§</sup>*Department of Chemistry, Hankuk University of Foreign Studies, Yongin 449-791, South Korea*

<sup>||</sup>*Non-Ferrous Materials Group, KITECH, Gangneung 25440, South Korea*

## Corresponding Authors

\* Dr. Young K. Jeong, Tel: +82-10-9215-0639, E-mail: immrc80@gmail.com

## Author Contribution

<sup>⊥</sup>These authors contributed to this work equally.

KEYWORDS : AlGa<sub>N</sub> layer; electron-blocking layer; layer separation; atom probe tomography

(nm)

|                          | m1-plane | m2-plane | m3-plane | m4-plane | m5-plane | m6-plane | Average | Standard Deviation | Coefficient of Variation |
|--------------------------|----------|----------|----------|----------|----------|----------|---------|--------------------|--------------------------|
| <b>Buffer</b>            | 165.1    | 170.0    | 164.5    | 154.4    | 147.6    | 153.2    | 159.1   | 7.89               | 0.0495                   |
| <b>1<sup>st</sup> Qb</b> | 16.8     | 18.0     | 17.0     | 14.4     | 14.8     | 14.8     | 16.0    | 1.35               | 0.0844                   |
| <b>2<sup>nd</sup> Qb</b> | 15.8     | 16.2     | 15.3     | 13.9     | 13.9     | 14.8     | 15.0    | 0.86               | 0.0576                   |
| <b>3<sup>rd</sup> Qb</b> | 14.8     | 16.2     | 14.4     | 13.5     | 13.9     | 13.9     | 14.4    | 0.88               | 0.0607                   |
| <b>4<sup>th</sup> Qb</b> | 31.4     | 37.7     | 36.0     | 36.8     | 25.2     | 36.9     | 34.0    | 4.45               | 0.1309                   |
| <b>1<sup>st</sup> Qw</b> | 7.2      | 7.2      | 7.6      | 7.2      | 7.2      | 7.1      | 7.3     | 0.18               | 0.0243                   |
| <b>2<sup>nd</sup> Qw</b> | 6.5      | 6.3      | 6.7      | 6.7      | 6.7      | 6.7      | 6.6     | 0.18               | 0.0269                   |
| <b>3<sup>rd</sup> Qw</b> | 6.1      | 6.3      | 6.3      | 6.3      | 6.3      | 6.3      | 6.3     | 0.07               | 0.0113                   |
| <b>4<sup>th</sup> Qw</b> | 6.1      | 5.8      | 5.8      | 5.8      | 5.8      | 5.8      | 5.9     | 0.10               | 0.0166                   |
| <b>EBL</b>               | 47.6     | 51.2     | 47.2     | 22.4     | 9.0      | 48.1     | 37.6    | 15.99              | 0.4257                   |
| <b>p-GaN</b>             | 202.8    | 213.1    | 189.8    | 214.2    | 211.4    | 186.1    | 202.9   | 11.24              | 0.0554                   |
| <b>Total</b>             | 520.2    | 547.9    | 510.6    | 495.6    | 461.9    | 493.8    | 505.0   | 26.39              | 5.23                     |

Table. S1. Thickness of each layer on every six m-planes of the micro-rod. Note that EBLs show highest standard deviation (11.99) and coefficient of variation values (0.4257) compared with other layers, indicating their asymmetric growths.

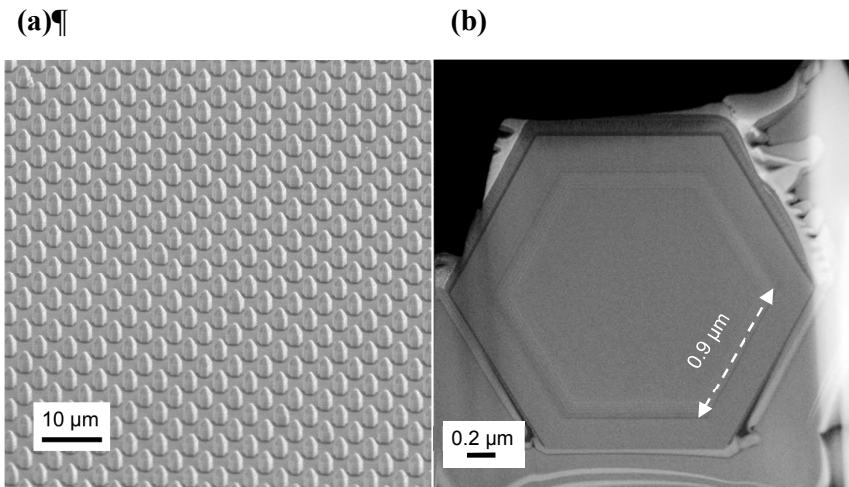

Figure. S1. (a) SEM image of GaN micro-rod LEDs array and (b) cross sectional HAADF-STEM image of the GaN core-shell micro-rod. The length of m-plane ranges in between 0.7 and 1  $\mu\text{m}$ .

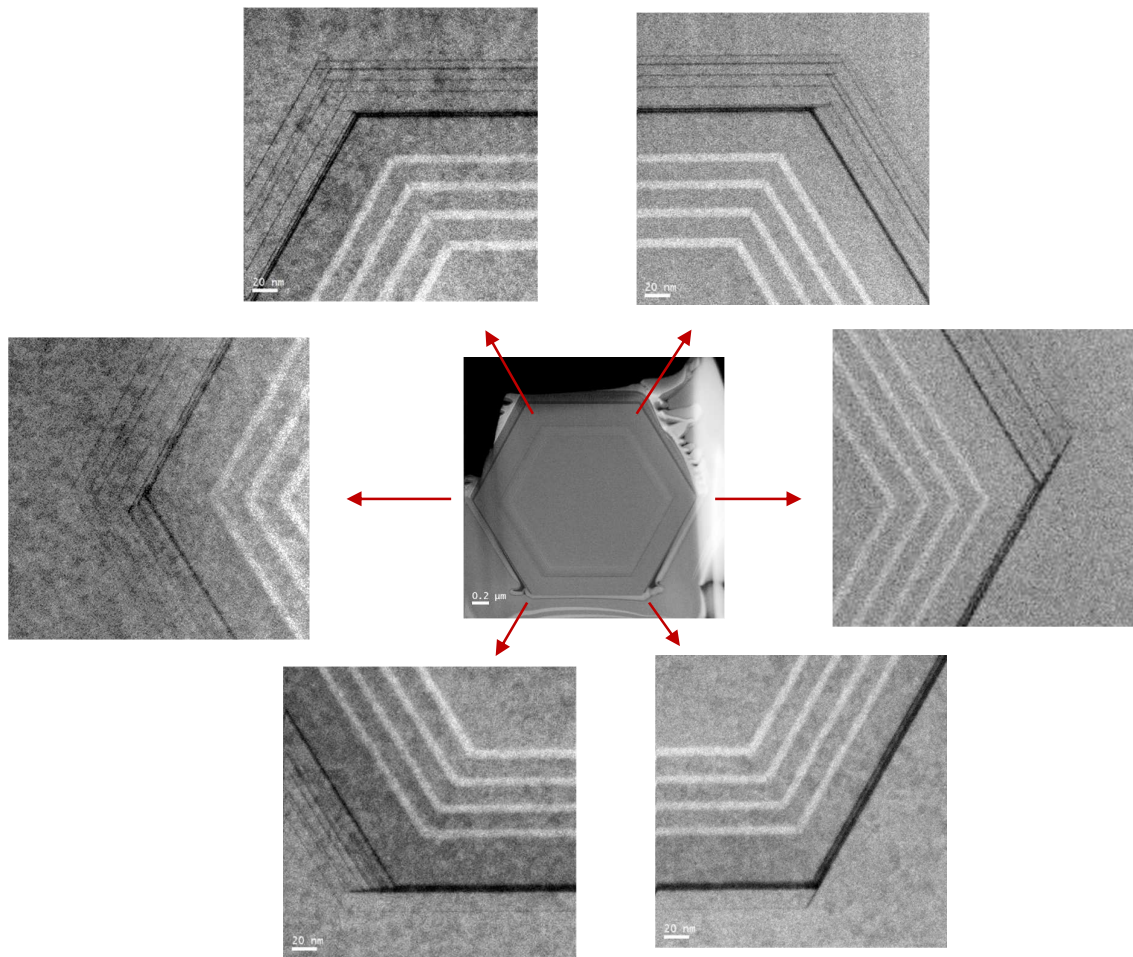

Figure. S2. Cross section HAADF-STEM images acquired at six different m-plane corners of a single micro-rod. The images show the phase-separated AlGaIn EBLs that have different thicknesses and lengths on the six m-planes of the GaN micro rod.
